# Supplementary material for: A Preconditioning Paradox: Contrasting Effects of Initial Phyllosphere and Early Leaf Decomposer Microfungi on Subsequent Colonization by Leaf Decomposing Non-Unit-Restricted Basidiomycetes
Source: MDPI journal article supplement (doi:10.3390/jof8090903), 2022-08-25
Supplement: s1 [file s1]

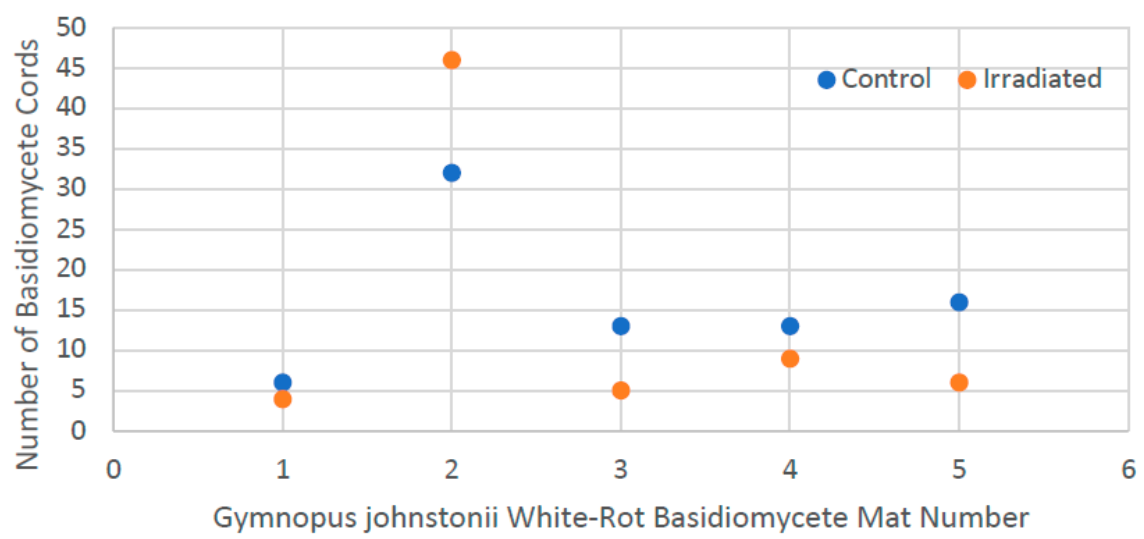

**Figure S1.** Number of Basidiomycete Cord Attachments to Leaves Irradiated vs. Non-Irradiated After 3-Months of Preconditioning by Microfungi.
